# Supplementary material for: Resistance to BRAF Inhibitors: EZH2 and Its Downstream Targets as Potential Therapeutic Options in Melanoma
Source: Int J Mol Sci. 2023 Jan 19;24(3):1963. doi: 10.3390/ijms24031963 (PMC9916477; doi:10.3390/ijms24031963)
Supplement: Supplementary file 1 [file ijms-24-01963-s001.zip › ijms-2103792-supplementary.pdf]

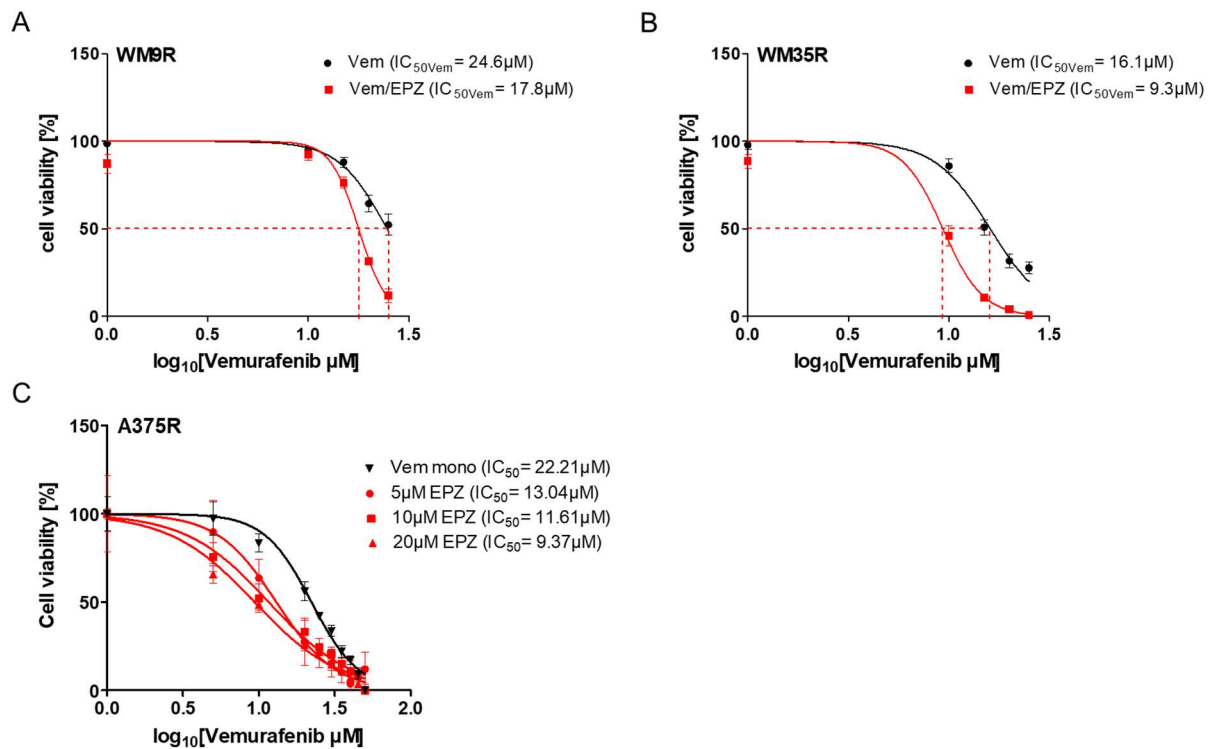

**Supplemental Figure S1.** Inhibition of EZH2 improves response to Vemurafenib in different resistant melanoma cell lines. Viability analyses of Vemurafenib (VEM) resistant cell lines **A)** WM9R and **B)** WM35R treated with increasing concentrations of Vemurafenib monotherapy or in combination with EPZ (5  $\mu M$ ). **C)** Cell viability assay of Vemurafenib resistant A375R cells with increasing concentrations of Vemurafenib monotherapy or in combination with different EPZ concentrations (5 - 20  $\mu M$ ).

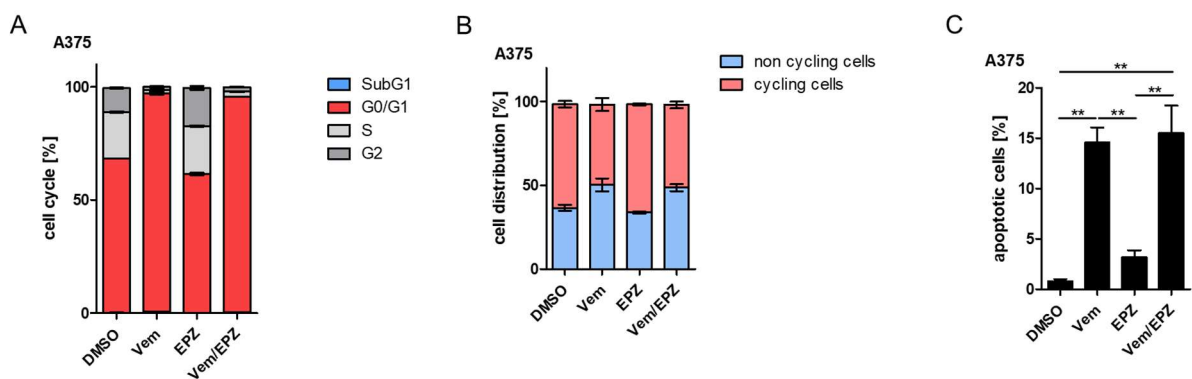

**Supplemental Figure S2.** Combination of Vemurafenib and EPZ has no additional effect compared with Vemurafenib alone on A375 cells. **A)** Cell cycle analyses of Vemurafenib susceptible A375 cells treated with DMSO, Vemurafenib (Vem) (1  $\mu M$ ), EPZ (5  $\mu M$ ) or Vemurafenib and EPZ in combination for 72 h. **B)** Bar chart represent cycling and non-cycling A375 cells after serum starvation and treatment as described above. **C)** Analysis of apoptosis for A375 cells treated as indicated. (\*\* p < 0.01)

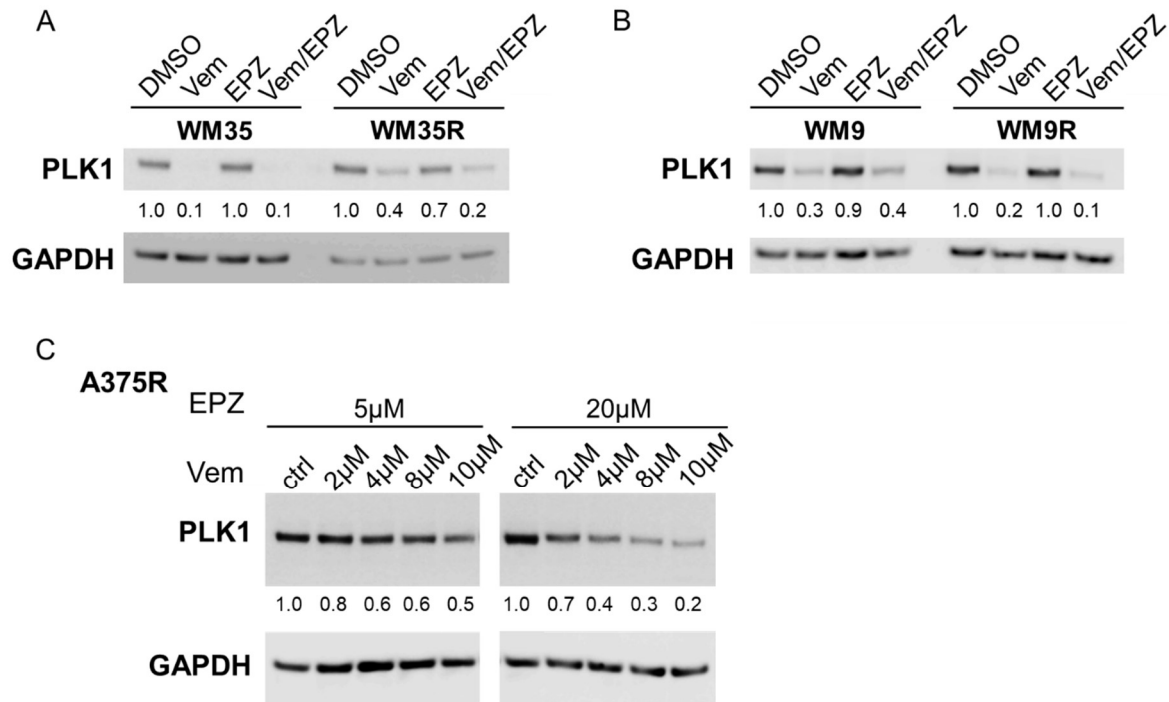

**Supplemental Figure S3.** Vemurafenib treatment decreased PLK1 protein expression. Western blot analysis of **A)** WM35 and WM35R as well as **B)** WM9 and WM9R, treated with DMSO, Vemurafenib (Vem) (susceptible cells 1  $\mu$ M and resistant cells 10  $\mu$ M), EPZ (5  $\mu$ M) or Vemurafenib and EPZ, examined PLK1 and GAPDH. **C)** Western blot of A375R cells, treated with increasing concentrations of Vemurafenib (0 – 10  $\mu$ M) in combination with two different concentrations of EPZ (5 and 20  $\mu$ M), investigated PLK1 and GAPDH.

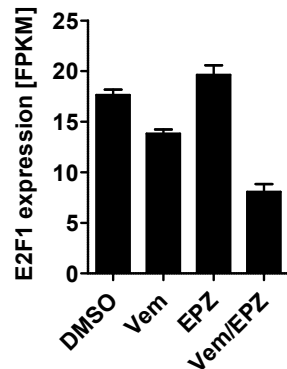

**Supplemental Figure S4.** E2F1 expression is downregulated after treatment with Vemurafenib or Vemurafenib and EPZ. E2F Transcription Factor 1 (E2F1) expression (fragments per kilobase of transcript) in A375R cells treated with DMSO (control), EPZ (5  $\mu$ M), Vemurafenib (Vem) (10  $\mu$ M) or Vemurafenib and EPZ.
